# Supplementary material
Source: HighWire-hosted journal article supplement (https://ez-admanager.com/highwire/filestream/134109/field_highwire_adjunct_files/0/exp_of_con_feb_5.pdf)
Supplement: exp_of_con_feb_5.pdf [file exp_of_con_feb_5.pdf]

**EDITORIAL EXPRESSION OF CONCERN: Herpes zoster as a risk factor for stroke and TIA: A retrospective cohort study in the UK**

With regard to the research article "Herpes zoster as a risk factor for stroke and TIA: A retrospective cohort study in the UK" by J. Breuer et al. (*Neurology*® 2014;82:206–212; published ahead of print January 2, 2014), we are publishing this Expression of Concern to alert readers that errors of data presentation have been uncovered since publication. The authors are preparing a corrected version of the paper.
